# Supplementary material for: Fabrication of Cu2ZnSn(S,Se)4photovoltaic devices with 10% efficiency by optimizing the annealing temperature of precursor films
Source: Royal Society of Chemistry journal article supplement (doi:10.1039/c7ra13069d), 2018-01-01
Supplement: c7ra13069d1.pdf [file c7ra13069d1.pdf]

## Electronic Supplementary Information (ESI)

### **Fabrication of a $\text{Cu}_2\text{ZnSn}(\text{S},\text{Se})_4$ photovoltaic devices with 10% efficiency by optimizing the annealing temperature of precursor films**

Pengpeng Zhang,<sup>a,b</sup> Qing Yu,<sup>a,b</sup> Xue Min,<sup>a,b</sup> Linbao Guo,<sup>a,b</sup> Jiangjian Shi,<sup>a</sup> Xiangyun Zhao,<sup>c</sup> Dongmei Li,<sup>a,b</sup> Yanhong Luo,<sup>a,b</sup> Huijue Wu,<sup>a</sup> Qingbo Meng<sup>\*a,b</sup> and Sixin Wu<sup>\*c</sup>

<sup>a</sup> Key Laboratory for Renewable Energy (CAS), Beijing Key Laboratory for New Energy Materials and Devices, Institute of Physics, Chinese Academy of Sciences, Beijing 100190, China

<sup>b</sup> School of Physical Sciences, University of Chinese Academy of Sciences, Beijing 100049, China

E-mail: qbmeng@iphy.ac.cn

<sup>c</sup> The Key Laboratory for Special Functional Materials of MOE, Henan University, Kaifeng, Henan 475004, China

E-mail: wusixin@henu.edu.cn

**Table S1.** Performance of  $\text{Cu}_2\text{ZnSn}(\text{S},\text{Se})_4$  (CZTSSe) solar cells with different annealing temperatures for precursor films

| 300 °C annealing temperature |                                                |                  |      |                   |     |                                                |                  |      |                   |
|------------------------------|------------------------------------------------|------------------|------|-------------------|-----|------------------------------------------------|------------------|------|-------------------|
|                              | $J_{sc}$<br>( $\text{mA}\cdot\text{cm}^{-2}$ ) | $V_{oc}$<br>(mV) | $FF$ | Efficiency<br>(%) |     | $J_{sc}$<br>( $\text{mA}\cdot\text{cm}^{-2}$ ) | $V_{oc}$<br>(mV) | $FF$ | Efficiency<br>(%) |
| A1                           | 30.18                                          | 420              | 0.58 | 7.31              | A2  | 29.84                                          | 409              | 0.46 | 5.59              |
| A3                           | 28.05                                          | 387.09           | 0.46 | 5.00              | A4  | 27.43                                          | 255.11           | 0.32 | 2.25              |
| A5                           | 28.27                                          | 222.12           | 0.31 | 1.92              | A6  | 30.13                                          | 409.23           | 0.53 | 6.53              |
| A7                           | 29.68                                          | 409.14           | 0.54 | 6.51              | A8  | 28.78                                          | 403.73           | 0.55 | 6.41              |
| A9                           | 30.54                                          | 381.66           | 0.53 | 6.18              | A10 | 30.98                                          | 409.24           | 0.53 | 6.68              |
| A11                          | 30.71                                          | 381.67           | 0.43 | 5.06              | A12 | 29.35                                          | 403.73           | 0.56 | 6.65              |
| A13                          | 29.79                                          | 398.17           | 0.52 | 6.15              | A14 | 28.38                                          | 409.24           | 0.54 | 6.22              |
| A15                          | 31.23                                          | 420.20           | 0.55 | 7.24              | A16 | 27.83                                          | 194.75           | 0.31 | 1.68              |
| A17                          | 30.05                                          | 425.70           | 0.56 | 7.18              | A18 | 27.88                                          | 365.24           | 0.42 | 4.23              |
| A19                          | 30.32                                          | 409.21           | 0.56 | 6.96              | A20 | 28.60                                          | 354.23           | 0.40 | 4.01              |
| A21                          | 30.03                                          | 425.71           | 0.55 | 6.98              | A22 | 31.32                                          | 343.25           | 0.38 | 4.11              |
| A23                          | 27.40                                          | 205.70           | 0.28 | 1.60              | A24 | 29.65                                          | 398.25           | 0.55 | 6.49              |
| A25                          | 29.08                                          | 288.20           | 0.32 | 2.67              | A26 | 29.99                                          | 392.75           | 0.55 | 6.43              |
| A27                          | 29.67                                          | 409.22           | 0.50 | 6.08              | A28 | 31.23                                          | 376.26           | 0.28 | 3.33              |
| A29                          | 29.84                                          | 288.21           | 0.32 | 2.73              | A30 | 29.61                                          | 321.26           | 0.32 | 3.03              |
| 350 °C annealing temperature |                                                |                  |      |                   |     |                                                |                  |      |                   |
| A1                           | 33.73                                          | 453.25           | 0.63 | 9.64              | A2  | 34.02                                          | 453.26           | 0.62 | 9.60              |
| A3                           | 33.78                                          | 447.75           | 0.64 | 9.65              | A4  | 30.62                                          | 458.76           | 0.61 | 8.62              |
| A5                           | 33.15                                          | 436.74           | 0.63 | 9.15              | A6  | 32.91                                          | 436.75           | 0.62 | 8.89              |
| A7                           | 31.03                                          | 436.74           | 0.62 | 8.46              | A8  | 33.12                                          | 425.75           | 0.61 | 8.61              |
| A9                           | 31.30                                          | 442.25           | 0.62 | 8.59              | A10 | 31.83                                          | 453.25           | 0.62 | 8.96              |
| A11                          | 32.39                                          | 431.24           | 0.61 | 8.59              | A12 | 31.58                                          | 436.74           | 0.61 | 8.44              |
| A13                          | 33.33                                          | 447.75           | 0.63 | 9.41              | A14 | 30.74                                          | 442.25           | 0.62 | 8.48              |
| A15                          | 31.99                                          | 447.75           | 0.61 | 8.71              | A16 | 31.11                                          | 442.25           | 0.62 | 8.56              |
| A17                          | 31.38                                          | 447.75           | 0.62 | 8.78              | A18 | 31.59                                          | 420.26           | 0.62 | 8.26              |
| A19                          | 32.15                                          | 442.25           | 0.62 | 8.82              | A20 | 32.20                                          | 442.25           | 0.63 | 8.99              |
| A21                          | 33.10                                          | 442.25           | 0.61 | 9.00              | A22 | 32.06                                          | 442.24           | 0.62 | 8.82              |
| A23                          | 32.43                                          | 442.25           | 0.62 | 8.86              | A24 | 32.31                                          | 436.74           | 0.61 | 8.60              |
| A25                          | 32.31                                          | 431.24           | 0.60 | 8.38              | A26 | 30.92                                          | 442.25           | 0.62 | 8.49              |
| A27                          | 31.37                                          | 453.26           | 0.63 | 8.98              | A28 | 31.19                                          | 442.25           | 0.61 | 8.44              |
| A29                          | 31.66                                          | 431.24           | 0.61 | 8.27              | A30 | 32.16                                          | 436.75           | 0.62 | 8.74              |
| 380 °C annealing temperature |                                                |                  |      |                   |     |                                                |                  |      |                   |

|                              |       |        |      |       |     |       |        |      |      |
|------------------------------|-------|--------|------|-------|-----|-------|--------|------|------|
| A1                           | 31.96 | 480.71 | 0.62 | 9.49  | A2  | 31.42 | 469.73 | 0.61 | 9.03 |
| A3                           | 32.04 | 480.70 | 0.63 | 9.70  | A4  | 32.50 | 469.72 | 0.62 | 9.45 |
| A5                           | 32.10 | 475.25 | 0.63 | 9.54  | A6  | 31.77 | 469.72 | 0.59 | 8.82 |
| A7                           | 33.46 | 475.24 | 0.62 | 9.92  | A8  | 32.47 | 464.26 | 0.60 | 9.01 |
| A9                           | 33.50 | 481.00 | 0.62 | 10.04 | A10 | 31.93 | 464.26 | 0.61 | 9.06 |
| A11                          | 33.57 | 475.24 | 0.61 | 9.77  | A12 | 32.92 | 464.25 | 0.60 | 9.10 |
| A13                          | 33.50 | 475.24 | 0.61 | 9.68  | A14 | 32.30 | 464.25 | 0.62 | 9.27 |
| A15                          | 32.47 | 475.23 | 0.62 | 9.57  | A16 | 33.00 | 464.25 | 0.62 | 9.54 |
| A17                          | 32.72 | 469.75 | 0.62 | 9.50  | A18 | 30.90 | 464.25 | 0.61 | 8.75 |
| A19                          | 32.48 | 469.75 | 0.63 | 9.56  | A20 | 34.71 | 464.25 | 0.60 | 9.69 |
| A21                          | 32.57 | 469.75 | 0.63 | 9.65  | A22 | 32.15 | 464.24 | 0.61 | 9.18 |
| A23                          | 32.73 | 469.74 | 0.61 | 9.41  | A24 | 32.50 | 464.24 | 0.61 | 9.25 |
| A25                          | 32.21 | 469.74 | 0.62 | 9.43  | A26 | 33.02 | 464.23 | 0.61 | 9.37 |
| A27                          | 32.39 | 469.74 | 0.64 | 9.66  | A28 | 32.39 | 464.23 | 0.60 | 8.96 |
| A29                          | 32.11 | 469.74 | 0.62 | 9.37  | A30 | 32.07 | 464.23 | 0.62 | 9.20 |
| 400 °C annealing temperature |       |        |      |       |     |       |        |      |      |
| A1                           | 33.51 | 442.05 | 0.63 | 9.39  | A2  | 32.15 | 442.20 | 0.63 | 9.00 |
| A3                           | 31.58 | 442.07 | 0.62 | 8.70  | A4  | 32.98 | 420.22 | 0.59 | 8.14 |
| A5                           | 31.94 | 436.58 | 0.63 | 8.79  | A6  | 31.48 | 442.22 | 0.62 | 8.61 |
| A7                           | 29.46 | 447.61 | 0.64 | 8.40  | A8  | 31.36 | 431.21 | 0.60 | 8.08 |
| A9                           | 29.58 | 447.63 | 0.64 | 8.42  | A10 | 32.06 | 420.24 | 0.59 | 8.02 |
| A11                          | 29.61 | 453.14 | 0.64 | 8.58  | A12 | 31.37 | 431.23 | 0.62 | 8.35 |
| A13                          | 31.39 | 442.15 | 0.63 | 8.81  | A14 | 31.63 | 431.23 | 0.62 | 8.48 |
| A15                          | 32.57 | 436.65 | 0.64 | 9.15  | A16 | 32.47 | 436.74 | 0.63 | 8.89 |
| A17                          | 31.10 | 442.16 | 0.64 | 8.74  | A18 | 31.06 | 431.23 | 0.61 | 8.18 |
| A19                          | 30.06 | 436.67 | 0.64 | 8.34  | A20 | 31.88 | 425.75 | 0.60 | 8.16 |
| A21                          | 32.25 | 442.18 | 0.62 | 8.89  | A22 | 31.58 | 431.24 | 0.60 | 8.18 |
| A23                          | 31.56 | 442.19 | 0.62 | 8.63  | A24 | 31.06 | 431.24 | 0.62 | 8.25 |
| A25                          | 31.42 | 431.18 | 0.59 | 7.96  | A26 | 31.88 | 436.75 | 0.60 | 8.37 |
| A27                          | 30.48 | 436.70 | 0.60 | 8.00  | A28 | 30.40 | 436.76 | 0.60 | 7.98 |
| A29                          | 30.53 | 442.20 | 0.61 | 8.29  | A30 | 31.91 | 431.25 | 0.62 | 8.47 |
| 450°C annealing temperature  |       |        |      |       |     |       |        |      |      |
| A1                           | 31.25 | 420.28 | 0.57 | 7.53  | A2  | 31.86 | 425.76 | 0.60 | 8.09 |
| A3                           | 30.13 | 420.28 | 0.59 | 7.47  | A4  | 27.35 | 425.77 | 0.49 | 5.68 |
| A5                           | 30.10 | 414.78 | 0.57 | 7.08  | A6  | 30.64 | 420.27 | 0.60 | 7.67 |
| A7                           | 29.28 | 414.78 | 0.56 | 6.85  | A8  | 33.73 | 387.25 | 0.58 | 7.59 |
| A9                           | 28.84 | 414.78 | 0.56 | 6.74  | A10 | 32.86 | 403.75 | 0.58 | 7.71 |

|     |       |        |      |      |     |       |        |      |      |
|-----|-------|--------|------|------|-----|-------|--------|------|------|
| A11 | 29.93 | 409.28 | 0.55 | 6.71 | A12 | 32.46 | 387.26 | 0.56 | 7.07 |
| A13 | 31.58 | 409.27 | 0.58 | 7.54 | A14 | 32.34 | 387.25 | 0.56 | 7.06 |
| A15 | 30.42 | 414.78 | 0.58 | 7.36 | A16 | 32.75 | 398.25 | 0.58 | 7.56 |
| A17 | 29.98 | 409.28 | 0.58 | 7.16 | A18 | 34.18 | 381.76 | 0.57 | 7.46 |
| A19 | 32.44 | 431.26 | 0.63 | 8.77 | A20 | 34.28 | 381.76 | 0.57 | 7.40 |
| A21 | 31.64 | 431.26 | 0.62 | 8.52 | A22 | 32.05 | 381.76 | 0.58 | 7.11 |
| A23 | 31.37 | 425.77 | 0.62 | 8.27 | A24 | 32.58 | 376.26 | 0.57 | 7.01 |
| A25 | 30.11 | 425.77 | 0.62 | 7.91 | A26 | 30.44 | 425.75 | 0.57 | 7.33 |
| A27 | 29.24 | 431.25 | 0.62 | 7.79 | A28 | 30.85 | 425.76 | 0.58 | 7.64 |
| A29 | 30.16 | 425.76 | 0.62 | 8.00 | A30 | 27.91 | 409.25 | 0.57 | 6.53 |

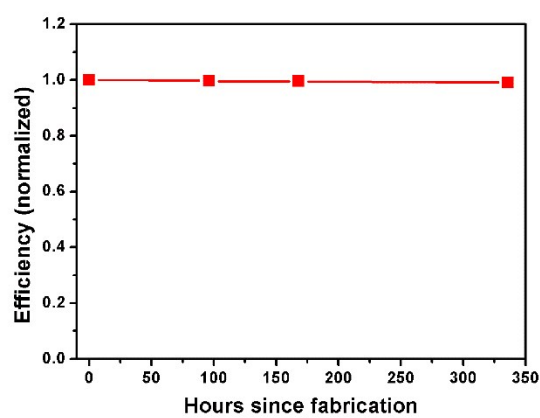

**Fig. S1** Efficiency of CZTSSe solar cells kept in an ambient environment as a function of storage time

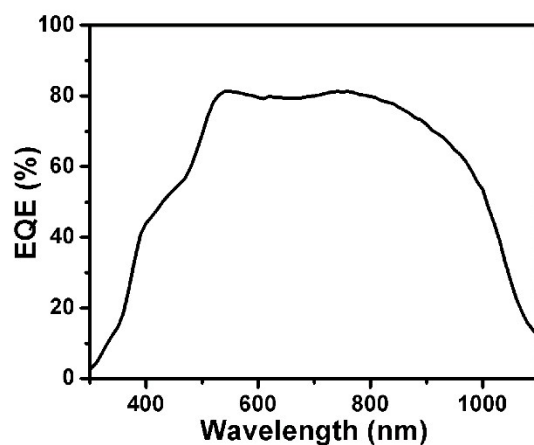

**Fig. S2** EQE of the champion CZTSSe solar cell
